# Supplementary material for: Characterization of lamin Mutation Phenotypes in Drosophila and Comparison to Human Laminopathies
Source: PubMed Central journal article supplement (PMC1885830; doi:10.1371/journal.pone.0000532), 2007-06-13
Supplement: pone.0000532.s002.pdf [file pone.0000532.s002.pdf]

**Figure S1**

Lamin phylogenetic comparisons

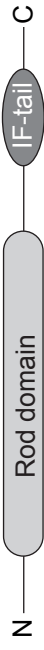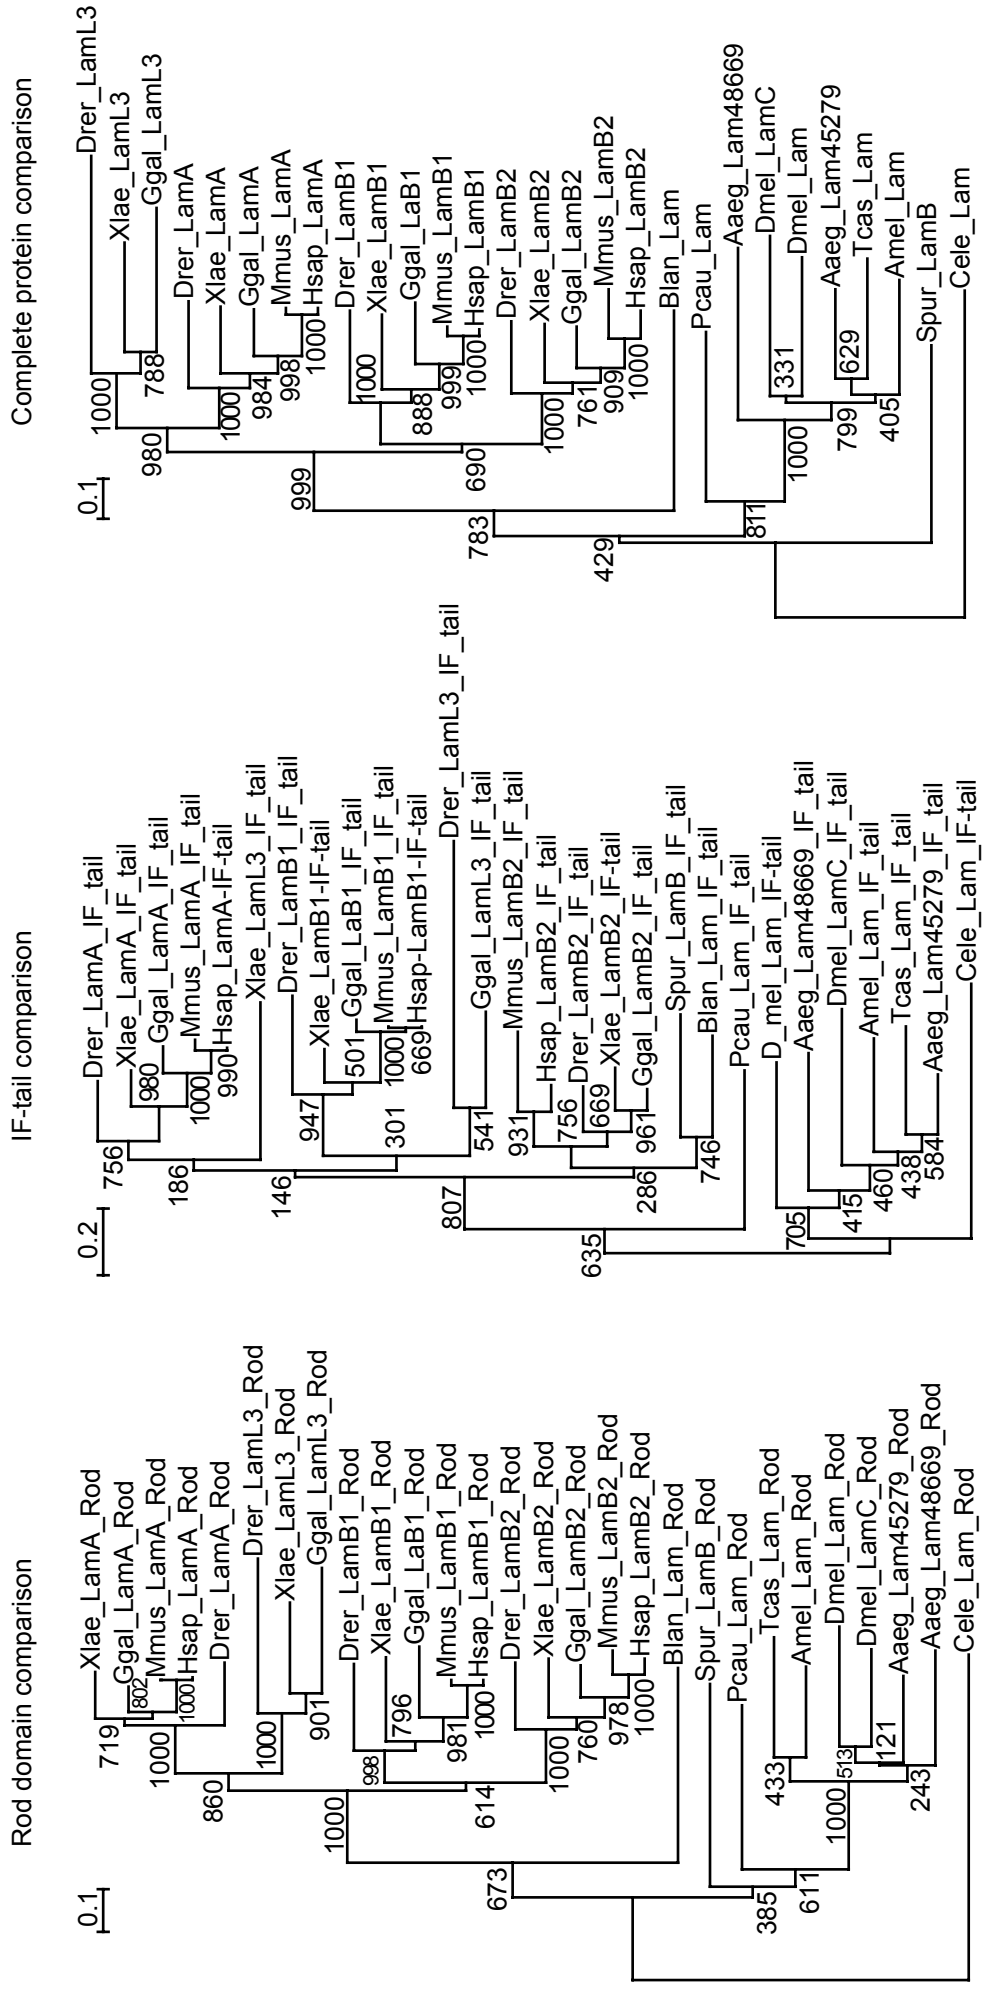

Bootstrap values are based on 1000 trials in all comparisons
